# Supplementary material for: Long Interleukin-22 Binding Protein Isoform-1 Is an Intracellular Activator of the Unfolded Protein Response
Source: Front Immunol. 2018 Dec 14;9:2934. doi: 10.3389/fimmu.2018.02934 (PMC6302113; doi:10.3389/fimmu.2018.02934)
Supplement: Supplementary Data 2 — Protein identified by mass spectrometry. [file Data_Sheet_2.xlsx]

## Sheet: Hoja1
BAND	PROTEIN	Accession	Description	Score	Coverage	# Proteins	# Unique Peptides	# Peptides	# PSMs	# AAs	MW [kDa]	calc. pI
3	GRP170	Q9Y4L1	Hypoxia up-regulated protein 1 OS=Homo sapiens GN=HYOU1 PE=1 SV=1 - [HYOU1_HUMAN]	122.981	1.6	1	1	1	2	999	111.266	5.22412
			A7	Sequence	# PSMs	# Proteins	# Protein Groups	Protein Group Accessions	Modifications	ΔCn	IonScore	Exp Value	Charge	MH+ [Da]	ΔM [ppm]	RT [min]	# Missed Cleavages
			High	AEAGPEGVAPAPEGEK	2	1	1	Q9Y4L1		0	81.69	9.72416e-08	2	1508.72	0.591281	17.7667	0
4	GRP94	P14625	Endoplasmin OS=Homo sapiens GN=HSP90B1 PE=1 SV=1 - [ENPL_HUMAN]	319.742	9.22	3	7	7	9	803	92.4113	4.84326
			A7	Sequence	# PSMs	# Proteins	# Protein Groups	Protein Group Accessions	Modifications	ΔCn	IonScore	Exp Value	Charge	MH+ [Da]	ΔM [ppm]	RT [min]	# Missed Cleavages
			High	GVVDSDDLPLNVSR	2	1	1	P14625		0	109.89	1.94361e-10	2	1485.76	0.45908	23.2167	0
			High	EAESSPFVER	1	1	1	P14625		0	59.89	8.76932e-06	2	1150.54	-0.371931	19.4167	0
			High	SGYLLPDTK	1	1	1	P14625		0	54.7	4.43886e-05	2	993.521	-3.87301	21.3667	0
			High	FAFQAEVNR	2	1	1	P14625		0	50.85	0.000110181	2	1081.54	-0.968913	21.9167	0
			High	ELISNASDALDK	1	2	1	P14625		0	47.23	0.000303721	2	1275.64	1.0756	21	0
			High	LGVIEDHSNR	1	2	1	P14625		0	45.1	0.000352294	2	1139.58	-2.00769	17.55	0
			High	LSLNIDPDAK	1	1	1	P14625		0	40.09	0.00124395	2	1085.59	2.90357	22.8667	0
8		P14625	Endoplasmin OS=Homo sapiens GN=HSP90B1 PE=1 SV=1 - [ENPL_HUMAN]	86.1402	2.99	1	2	2	2	803	92.4113	4.84326
			A7	Sequence	# PSMs	# Proteins	# Protein Groups	Protein Group Accessions	Modifications	ΔCn	IonScore	Exp Value	Charge	MH+ [Da]	ΔM [ppm]	RT [min]	# Missed Cleavages
			High	GVVDSDDLPLNVSR	1	1	1	P14625		0	78.03	2.71512e-07	2	1485.75	-0.348591	22.8667	0
			High	LSLNIDPDAK	1	1	1	P14625		0	31.71	0.00887004	2	1085.58	-1.14954	22.55	0
5	Calnexin	P27824	Calnexin OS=Homo sapiens GN=CANX PE=1 SV=2 - [CALX_HUMAN]	29.18	1.52	1	1	1	1	592	67.5259	4.60205
			A7	Sequence	# PSMs	# Proteins	# Protein Groups	Protein Group Accessions	Modifications	ΔCn	IonScore	Exp Value	Charge	MH+ [Da]	ΔM [ppm]	RT [min]	# Missed Cleavages
			High	AEEDEILNR	1	1	1	P27824		0	29.18	0.010508	2	1088.52	-2.18455	19.2833	0
9		P27824	Calnexin OS=Homo sapiens GN=CANX PE=1 SV=2 - [CALX_HUMAN]	234.66	13.18	1	6	6	6	592	67.5259	4.60205
			A7	Sequence	# PSMs	# Proteins	# Protein Groups	Protein Group Accessions	Modifications	ΔCn	IonScore	Exp Value	Charge	MH+ [Da]	ΔM [ppm]	RT [min]	# Missed Cleavages
			High	SDAEEDGGTVSQEEEDR	1	1	1	P27824		0	95.45	2.84426e-10	2	1852.73	0.0604945	15.9167	0
			High	APVPTGEVYFADSFDR	1	1	1	P27824		0	90.7	8.63905e-09	2	1770.83	-0.39412	25.4667	0
			High	IPDPEAVKPDDWDEDAPAK	1	1	1	P27824		0	46.33	0.000225825	3	2107.98	0.457997	21.8667	0
			High	TDAPQPDVK	1	1	1	P27824		0	40.63	0.000752522	2	970.49	6.05063	15.6	0
			High	AEEDEILNR	1	1	1	P27824		0	38.26	0.00126141	2	1088.52	-4.20565	19.0333	0
			High	EIEDPEDR	1	1	1	P27824		0	24.35	0.0106512	2	1002.44	-0.975543	16.0167	0
1	GRP78	P11021	78 kDa glucose-regulated protein OS=Homo sapiens GN=HSPA5 PE=1 SV=2 - [GRP78_HUMAN]	574.378	28.29	8	14	14	14	654	72.2884	5.16064
			A7	Sequence	# PSMs	# Proteins	# Protein Groups	Protein Group Accessions	Modifications	ΔCn	IonScore	Exp Value	Charge	MH+ [Da]	ΔM [ppm]	RT [min]	# Missed Cleavages
			High	SQIFSTASDNQPTVTIK	1	1	1	P11021		0	90.93	1.52971e-08	2	1836.94	2.76116	22.3833	0
			High	IINEPTAAAIAYGLDKR	1	1	1	P11021		0	89.68	1.72234e-08	3	1816	-0.751406	24.25	1
			High	IINEPTAAAIAYGLDK	1	4	1	P11021		0	74.19	7.64037e-07	2	1659.9	2.79058	25.1167	0
			High	NQLTSNPENTVFDAK	1	1	1	P11021		0	70.88	1.16363e-06	2	1677.81	1.55088	21.85	0
			High	VEIIANDQGNR	1	7	1	P11021		0	69.57	1.63956e-06	2	1228.63	2.6225	18.45	0
			High	LYGSAGPPPTGEEDTAEKDEL	1	1	1	P11021		0	68.82	1.02352e-06	2	2175.99	-0.458605	21.3167	1
			High	ITPSYVAFTPEGER	1	1	1	P11021		0	57.25	2.92907e-05	2	1566.78	2.43306	23.3	0
			High	TWNDPSVQQDIK	1	1	1	P11021		0	56.56	2.87041e-05	2	1430.69	0.581593	20.65	0
			High	ELEEIVQPIISK	1	1	1	P11021		0	54.65	3.82186e-05	2	1397.79	0.0229505	24.6833	0
			High	SDIDEIVLVGGSTR	1	1	1	P11021		0	48.57	0.000285635	2	1460.75	-4.29088	24.6167	0
			High	ALSSQHQAR	1	1	1	P11021		0	47.98	0.000177531	2	997.512	-5.49158	13.6833	0
			High	DNHLLGTFDLTGIPPAPR	1	1	1	P11021		0	45.12	0.000616757	3	1934.01	-3.35291	26.7667	0
			High	LTPEEIER	1	2	1	P11021		0	34.63	0.0045282	2	986.516	0.377166	19.0167	0
			High	VTHAVVTVPAYFNDAQR	1	1	1	P11021		0	32.37	0.0112989	3	1887.98	2.28046	23.2333	0
6		P11021	78 kDa glucose-regulated protein OS=Homo sapiens GN=HSPA5 PE=1 SV=2 - [GRP78_HUMAN]	745.975	33.79	8	18	18	23	654	72.2884	5.16064
			A7	Sequence	# PSMs	# Proteins	# Protein Groups	Protein Group Accessions	Modifications	ΔCn	IonScore	Exp Value	Charge	MH+ [Da]	ΔM [ppm]	RT [min]	# Missed Cleavages
			High	SQIFSTASDNQPTVTIK	1	1	1	P11021		0	109.55	2.18507e-10	2	1836.93	-1.48504	22.2167	0
			High	IINEPTAAAIAYGLDKR	1	1	1	P11021		0	87.3	2.61623e-08	3	1816.01	5.36091	23.9667	1
			High	LYGSAGPPPTGEEDTAEKDEL	2	1	1	P11021		0	80.11	8.09241e-08	2	2176	1.56346	21.05	1
			High	NQLTSNPENTVFDAK	1	1	1	P11021		0	71.1	1.08286e-06	2	1677.81	2.26609	21.6333	0
			High	TWNDPSVQQDIK	2	1	1	P11021		0	66.8	2.86234e-06	2	1430.7	4.49577	20.4833	0
			High	IINEPTAAAIAYGLDK	2	4	1	P11021		0	58.55	2.83463e-05	2	1659.9	3.75449	24.8833	0
			High	SDIDEIVLVGGSTR	1	1	1	P11021		0	58.01	3.23365e-05	2	1460.76	1.32265	24.4167	0
			High	ITITNDQNR	1	1	1	P11021		0	54.74	7.52052e-05	2	1074.56	3.97566	16.5167	0
			High	ITPSYVAFTPEGER	2	1	1	P11021		0	51.49	0.000107501	2	1566.78	-1.14114	23.2667	0
			High	VEIIANDQGNR	1	7	1	P11021		0	50.43	0.000134501	2	1228.63	1.48302	18.1167	0
			High	ELEEIVQPIISK	1	1	1	P11021		0	49.24	0.000136397	2	1397.79	2.45536	24.4833	0
			High	LTPEEIER	1	2	1	P11021		0	48.12	0.000185775	2	986.523	7.27006	18.6833	0
			High	DAGTIAGLNVmR	1	1	1	P11021	M11(Oxidation)	0	42.24	0.000895553	2	1233.61	-10.8242	21.1167	0
			High	NELESYAYSLK	2	1	1	P11021		0	41.06	0.000869607	2	1316.64	1.68769	23.2167	0
			High	VTHAVVTVPAYFNDAQR	1	1	1	P11021		0	40.75	0.00153975	3	1887.97	1.64486	23.0167	0
			High	IEWLESHQDADIEDFK	1	1	1	P11021		0	31.64	0.00510689	3	1974.91	-0.458022	24.4333	0
			High	IQQLVK	1	1	1	P11021		0	31.06	0.010968	2	728.469	2.73461	17.4667	0
			High	ETAEAYLGK	1	1	1	P11021		0	30.83	0.00937553	2	981.49	0.745887	18.6167	0
10		P11021	78 kDa glucose-regulated protein OS=Homo sapiens GN=HSPA5 PE=1 SV=2 - [GRP78_HUMAN]	503.394	19.57	7	10	10	13	654	72.2884	5.16064
			A7	Sequence	# PSMs	# Proteins	# Protein Groups	Protein Group Accessions	Modifications	ΔCn	IonScore	Exp Value	Charge	MH+ [Da]	ΔM [ppm]	RT [min]	# Missed Cleavages
			High	SQIFSTASDNQPTVTIK	1	1	1	P11021		0	93.95	7.99393e-09	2	1836.95	8.31383	22.95	0
			High	NQLTSNPENTVFDAK	2	1	1	P11021		0	85.68	3.85314e-08	2	1677.81	1.43168	22.4833	0
			High	ITPSYVAFTPEGER	1	1	1	P11021		0	73.89	6.7781e-07	2	1566.79	4.3478	23.95	0
			High	SDIDEIVLVGGSTR	1	1	1	P11021		0	68.43	2.94275e-06	2	1460.76	-1.14182	25.25	0
			High	TWNDPSVQQDIK	2	1	1	P11021		0	64.28	4.53499e-06	2	1430.69	-2.49385	21.2	0
			High	ELEEIVQPIISK	1	1	1	P11021		0	52.17	6.76511e-05	2	1397.79	-1.40788	25.3667	0
			High	NELESYAYSLK	1	1	1	P11021		0	45.02	0.000305332	2	1316.63	-8.03411	24.0167	0
			High	VEIIANDQGNR	2	7	1	P11021		0	42.47	0.000770085	2	1228.62	-9.58633	18.9	0
			High	VYEGERPLTK	1	1	1	P11021		0	39.7	0.00207339	2	1191.62	-11.8644	17.2167	0
			High	DAGTIAGLNVMR	1	1	1	P11021		0	32.55	0.0098673	2	1217.62	-6.92983	24.3333	0
2	IL-22BP	Q969J5	Interleukin-22 receptor subunit alpha-2 OS=Homo sapiens GN=IL22RA2 PE=1 SV=1 - [I22R2_HUMAN]	469.745	20.53	1	6	6	11	263	30.5299	8.06006
			A7	Sequence	# PSMs	# Proteins	# Protein Groups	Protein Group Accessions	Modifications	ΔCn	IonScore	Exp Value	Charge	MH+ [Da]	ΔM [ppm]	RT [min]	# Missed Cleavages
			High	AASAGSYSEWSMTPR	2	1	1	Q969J5		0	126.87	1.06906e-12	2	1600.71	3.01246	22.8833	0
			High	AASAGSYSEWSmTPR	1	1	1	Q969J5	M12(Oxidation)	0	102.41	2.26776e-10	2	1616.7	2.04557	20.7167	0
			High	VFIINNSLEKEQK	1	1	1	Q969J5		0	51.25	0.000113234	2	1561.86	3.47154	22.5667	1
			High	VQFQSR	3	1	1	Q969J5		0	51.19	0.000112528	2	764.403	-2.44363	16.8833	0
			High	NFHNILQWQPGR	2	1	1	Q969J5		0	50.55	0.000147135	2	1509.78	2.72364	25.25	0
			High	VFIINNSLEK	1	1	1	Q969J5		0	45.8	0.000418213	2	1176.67	5.07541	23.8833	0
			High	FTPWWETK	1	1	1	Q969J5		0	32.58	0.00604525	2	1094.53	2.12153	26.4667	0
7		Q969J5	Interleukin-22 receptor subunit alpha-2 OS=Homo sapiens GN=IL22RA2 PE=1 SV=1 - [I22R2_HUMAN]	165.505	15.21	1	4	4	5	263	30.5299	8.06006
			A7	Sequence	# PSMs	# Proteins	# Protein Groups	Protein Group Accessions	Modifications	ΔCn	IonScore	Exp Value	Charge	MH+ [Da]	ΔM [ppm]	RT [min]	# Missed Cleavages
			High	AASAGSYSEWSMTPR	1	1	1	Q969J5		0	84.97	1.76723e-08	2	1600.72	9.25963	22.9833	0
			High	NFHNILQWQPGR	2	1	1	Q969J5		0	51.32	0.000123599	2	1509.77	-2.57518	25.4	0
			High	VQFQSR	1	1	1	Q969J5		0	35.64	0.00376599	2	764.407	2.52755	16.5167	0
			High	VYEGAHR	1	1	1	Q969J5		0	31.25	0.0056992	2	831.407	-4.66429	13.5833	0
